# Supplementary material
Source: publisher figshare collection journal article supplement (https://gsajournals.figshare.com/ndownloader/files/13477058)
Supplement: Supplementary file 1 [file 13477058]

**Table S3.** Pair-wise Pearson’s correlation coefficient for stripe rust resistance phenotypic values.

|  | ROS_2011_YR_IT2 | GH_2011_YR_IT2 | ROS_2010_YR_IT2 | ROS_2011_YR_SV3 | GH_2011_YR_SV1 | ROS_2010_YR_SV1 | TEX_2012_YR_IT | GH_2010_YR_SD |
| --- | --- | --- | --- | --- | --- | --- | --- | --- |
| ROS_2011_YR_IT2 | - |  |  |  |  |  |  |  |
| GH_2011_YR_IT2 | 0.73 | - |  |  |  |  |  |  |
| ROS_2010_YR_IT2 | 0.42 | 0.43 | - |  |  |  |  |  |
| ROS_2011_YR_SV3 | 0.64 | 0.70 | 0.61 | - |  |  |  |  |
| GH_2011_YR_SV1 | 0.36 | 0.46 | 0.39 | 0.44 | - |  |  |  |
| ROS_2010_YR_SV1 | 0.43 | 0.57 | 0.68 | 0.79 | 0.33 | - |  |  |
| TEX_2012_YR_IT | 0.22 | 0.42 | 0.55 | 0.57 | 0.31 | 0.61 | - |  |
| GH_2010_YR_SD | 0.07 | 0.28 | 0.44 | 0.37 | 0.33 | 0.40 | 0.52 | - |
